# Supplementary material for: Peer-Based Social Media Features in Behavior Change Interventions: Systematic Review
Source: PubMed Central journal article supplement (PMC5843796; doi:10.2196/jmir.8342), 2018-02-22
Supplement: jmir_v20i2e20_app1.pdf [file jmir_v20i2e20_app1.pdf]

|                      |                                                                                                                                                                                                                                                                                                                                                                                                                                                                                                                                                                                                                                                                                                                                                               |
|----------------------|---------------------------------------------------------------------------------------------------------------------------------------------------------------------------------------------------------------------------------------------------------------------------------------------------------------------------------------------------------------------------------------------------------------------------------------------------------------------------------------------------------------------------------------------------------------------------------------------------------------------------------------------------------------------------------------------------------------------------------------------------------------|
| 1. Social Media      | social network* OR social feature* OR social tool* OR social component* OR social media OR social support OR peer support OR facebook OR linkedin OR twitter OR badoo OR orkut OR myspace or youtube or Instagram OR poll* OR survey* OR questionnaire* OR group* OR messag* OR leader board* OR rank* table* OR profile OR forum OR quiz OR diary OR diaries OR knowledge repositior* OR progress viewing OR notification* OR rival nomination OR goal setting OR sharing OR comment* OR feed* OR reminder* OR self-reporting tool* OR planner* OR chat*                                                                                                                                                                                                     |
| 2. Internet          | online OR web OR internet                                                                                                                                                                                                                                                                                                                                                                                                                                                                                                                                                                                                                                                                                                                                     |
| 3. Mobile            | smartphone OR mobile OR android OR iphone                                                                                                                                                                                                                                                                                                                                                                                                                                                                                                                                                                                                                                                                                                                     |
| 4. Intervention      | behaviour change intervention* OR behavior change intervention* OR digital intervention*                                                                                                                                                                                                                                                                                                                                                                                                                                                                                                                                                                                                                                                                      |
| 5. Target Behaviours | (alcohol OR binge drink* OR healthy eating OR nutrition OR diet* OR , exercis* OR sport* OR sedentary* OR physical OR inactiv* OR motor activit* OR tobacco OR smoking OR nicotine OR weight loss)                                                                                                                                                                                                                                                                                                                                                                                                                                                                                                                                                            |
| 6. Combined          | 1 AND (2 OR 3) AND 4 AND 5                                                                                                                                                                                                                                                                                                                                                                                                                                                                                                                                                                                                                                                                                                                                    |
| Query:               | (social network* OR social feature* OR social tool* OR social component* OR social media OR social support OR peer support OR facebook OR linkedin OR twitter OR badoo OR orkut OR myspace or youtube or Instagram OR poll* OR survey* OR questionnaire* OR group* OR messag* OR leader board* OR rank* table* OR profile OR forum OR quiz OR diary OR diaries OR knowledge repositior* OR progress viewing OR notification* OR rival nomination OR goal setting OR sharing OR comment* OR feed* OR reminder* OR self-reporting tool* OR planner* OR chat*)<br>AND<br>((online OR web OR internet)<br>OR<br>(smartphone OR mobile OR android OR iphone))<br>AND<br>(behaviour change intervention* OR behavior change intervention* OR digital intervention*) |

AND

(alcohol OR binge drink\* OR healthy eating OR nutrition OR diet\*  
OR , exercis\* OR sport\* OR sedentary\* OR physical OR inactiv\* OR  
motor activit\* OR tobacco OR smoking OR nicotine OR weight loss)
