# Supplementary material for: Peer-Based Social Media Features in Behavior Change Interventions: Systematic Review
Source: PubMed Central journal article supplement (PMC5843796; doi:10.2196/jmir.8342), 2018-02-22
Supplement: jmir_v20i2e20_app4.pdf [file jmir_v20i2e20_app4.pdf]

Multimedia Appendix 4. Inclusion of specific social media features by behavior.

| Category or subcategory                                 | <sup>a</sup> SMFs                      | All studies reviewed, n/N (%) | Physical activity, n/N (%) | Diet and nutrition, n/N (%) | Smoking cessation, n/N (%) | Alcohol consumption, n/N (%) | Weight loss or weight maintenance, n/N (%) |
|---------------------------------------------------------|----------------------------------------|-------------------------------|----------------------------|-----------------------------|----------------------------|------------------------------|--------------------------------------------|
| Identity representation                                 | User profile                           | 35/134 (26.1)                 | 23/94 (24)                 | 17/65 (26)                  | 9/26 (35) <sup>b</sup>     | 0/6 (0)                      | 11/46 (24)                                 |
|                                                         | Avatar                                 | 9/134 (6.7)                   | 7/94 (7)                   | 3/65 (5)                    | 2/26 (8)                   | 0/6 (0)                      | 2/46 (4)                                   |
|                                                         | All SMFs under identity representation |                               | 27/94 (29)                 | 18/65 (28)                  | 9/26 (35)                  | 0/6 (0)                      | 12/46 (26)                                 |
| Communication ► many to many ► synchronous <sup>c</sup> | Chat room (text based)                 | 22/134 (16.4)                 | 13/94 (14)                 | 14/65 (21)                  | 6/26 (23)                  | 2/6 (33)                     | 11/46 (24)                                 |
|                                                         | Group video conferencing               | 3/134 (2.2)                   | 3/94 (3)                   | 2/65 (3)                    | 0/26 (0)                   | 0/6 (0)                      | 2/46 (4)                                   |
| Communication ► many to many ► asynchronous             | Online forum                           | 78/134 (58.2)                 | 58/94 (62)                 | 41/65 (62)                  | 16/26 (62)                 | 3/6 (50)                     | 32/46 (70)                                 |
|                                                         | Mailing list                           | 5/134 (3.7)                   | 3/94 (3)                   | 3/65 (5)                    | 1/26 (4)                   | 1/6 (17)                     | 2/46 (4)                                   |
|                                                         | Peer commenting                        | 33/134 (24.6)                 | 21/94 (22)                 | 16/65 (24)                  | 8/26 (31)                  | 0/6 (0)                      | 10/46 (22)                                 |
|                                                         | Social notice board (group walls)      | 18/134 (13.4)                 | 12/94 (13)                 | 11/65 (17)                  | 2/26 (8)                   | 0/6 (0)                      | 7/46 (15)                                  |
| Communication ► one to one                              | Text chatting                          | 19/134 (14.2)                 | 13/94 (14)                 | 9/65 (14)                   | 2/26 (8)                   | 1/6 (17)                     | 6/46 (13)                                  |
|                                                         | Peer SMS <sup>d</sup> text messages    | 7/134 (5.2)                   | 3/94 (3)                   | 2/65 (3)                    | 4/26 (15)                  | 1/6 (17)                     | 1/46 (2)                                   |
|                                                         | Peer web messaging or emailing         | 33/134 (24.6)                 | 23/94 (24)                 | 17/65 (26)                  | 6/26 (23)                  | 1/6 (17)                     | 14/46 (30)                                 |
|                                                         | Video call                             | 1/134 (0.7)                   | 1/94 (1)                   | 0/65 (0)                    | 0/26 (0)                   | 0/6 (0)                      | 0/46 (0)                                   |
| Communication ► one way                                 | Symbolic support                       | 22/134 (16.4)                 | 12/94 (13)                 | 10/65 (15)                  | 6/26 (23)                  | 0/6 (0)                      | 6/46 (13)                                  |
|                                                         | Social tagging                         | 3/134 (2.2)                   | 2/94 (2)                   | 2/65 (3)                    | 0/26 (0)                   | 0/6 (0)                      | 0/46 (0)                                   |
|                                                         | Peer data rating or evaluation         | 1/134 (0.7)                   | 0/94 (0)                   | 1/65 (2)                    | 0/26 (0)                   | 0/6 (0)                      | 0/46 (0)                                   |
|                                                         | All SMFs under communication           |                               | 86/94 (92)                 | 61/65 (94)                  | 26/26 (100)                | 5/6 (83)                     | 44/46 (96)                                 |

|                                                 |                                                               |               |            |            |            |          |            |
|-------------------------------------------------|---------------------------------------------------------------|---------------|------------|------------|------------|----------|------------|
| Peer grouping                                   | Online teams, clubs or groups                                 | 9/134 (6.7)   | 9/94 (10)  | 2/65 (3)   | 0/26 (0)   | 0/6 (0)  | 1/46 (2)   |
|                                                 | OSN <sup>®</sup> -based groups                                | 14/134 (10.4) | 9/94 (10)  | 7/65 (11)  | 2/26 (8)   | 0/6 (0)  | 5/46 (11)  |
|                                                 | One-to-one social connections (friending or buddy nomination) | 50/134 (37.3) | 33/94 (35) | 22/65 (33) | 12/26 (46) | 1/6 (17) | 14/46 (30) |
|                                                 | All SMFs under peer grouping                                  |               | 39/94 (41) | 23/65 (35) | 12/26 (46) | 1/6 (17) | 15/46 (33) |
| Data sharing                                    | Activity data                                                 | 21/134 (15.7) | 17/94 (18) | 6/65 (9)   | 3/26 (12)  | 0/6 (0)  | 4/46 (9)   |
|                                                 | Goal data                                                     | 6/134 (4.5)   | 1/94 (1)   | 0/65 (0)   | 5/26 (19)  | 0/6 (0)  | 0/46 (0)   |
|                                                 | Poll voting                                                   | 8/134 (6.0)   | 4/94 (4)   | 6/65 (9)   | 2/26 (8)   | 0/6 (0)  | 4/46 (9)   |
|                                                 | Blogs, testimonial, or experience sharing                     | 16/134 (11.9) | 8/94 (9)   | 8/65 (12)  | 6/26 (23)  | 1/6 (17) | 6/46 (13)  |
|                                                 | All SMFs under data sharing                                   |               | 33/94 (35) | 24/65 (37) | 7/26 (27)  | 1/6 (17) | 13/46 (28) |
| Competition                                     | Social quiz                                                   | 3/134 (2.2)   | 2/94 (2)   | 2/65 (3)   | 1/26 (4)   | 0/6 (0)  | 0/46 (0)   |
|                                                 | Social rewards                                                | 11/134 (8.2)  | 11/94 (12) | 4/65 (6)   | 0/26 (0)   | 0/6 (0)  | 3/46 (7)   |
|                                                 | Social challenge                                              | 5/134 (3.7)   | 5/94 (5)   | 2/65 (3)   | 0/26 (0)   | 0/6 (0)  | 1/46 (2)   |
|                                                 | Activities and contests (team based)                          | 3/134 (2.2)   | 3/94 (3)   | 1/65 (2)   | 0/26 (0)   | 0/6 (0)  | 0/46 (0)   |
|                                                 | Activities and contests (individual based)                    | 12/134 (9.0)  | 10/94 (11) | 5/65 (8)   | 1/26 (4)   | 0/6 (0)  | 4/46 (9)   |
|                                                 | All SMFs under competition                                    |               | 23/94 (24) | 10/65 (15) | 2/26 (8)   | 0/6 (0)  | 6/46 (13)  |
| Activity data viewing ►<br>peer data comparison | Leaderboard or ranking table                                  | 8/134 (6.0)   | 8/94 (9)   | 2/65 (3)   | 0/26 (0)   | 0/6 (0)  | 1/46 (2)   |
|                                                 | Other textual comparison                                      | 10/134 (7.5)  | 9/94 (10)  | 2/65 (3)   | 1/26 (4)   | 0/6 (0)  | 1/46 (2)   |
|                                                 | Graphical or video-based comparison                           | 7/134 (5.2)   | 7/94 (7)   | 3/65 (5)   | 0/26 (0)   | 0/6 (0)  | 2/46 (4)   |
|                                                 | Social norm or aggregated data comparison                     | 8/134 (6.0)   | 6/94 (6)   | 3/65 (5)   | 0/26 (0)   | 1/6 (17) | 0/46 (0)   |

|                                              |                                      |               |                   |                 |                  |          |                  |
|----------------------------------------------|--------------------------------------|---------------|-------------------|-----------------|------------------|----------|------------------|
| Activity data viewing ►<br>peer data updates | Social notification                  | 3/134 (2.2)   | <i>2/94 (2)</i>   | <i>1/65 (2)</i> | 0/26 (0)         | 0/6 (0)  | 0/46 (0)         |
|                                              | Feeds                                | 26/134 (19.4) | 17/94 (18)        | 12/65 (18)      | <i>6/26 (23)</i> | 0/6 (0)  | 8/46 (17)        |
|                                              | All SMFs under activity data viewing |               | <i>37/94 (39)</i> | 20 (31)         | <i>7/26 (27)</i> | 1/6 (17) | 11/46 (24)       |
| OSN                                          | Generic and conventional             | 16/134 (11.9) | 11/94 (12)        | 8/65 (12)       | 2/26 (8)         | 0/6 (0)  | <i>6/46 (13)</i> |
|                                              | Virtual world                        | 17/134 (12.7) | 12/94 (13)        | 9/65 (14)       | <i>4/26 (15)</i> | 0/6 (0)  | 6/46 (13)        |
|                                              | Purpose-designed                     | 4/134 (3.0)   | 2/94 (2)          | 2/65 (3)        | <i>2/26 (8)</i>  | 0/6 (0)  | 1/46 (2)         |
|                                              | All SMFs under OSN                   |               | 25 (27)           | 19 (29)         | <i>8/26 (31)</i> | 0/6 (0)  | 13/46 (28)       |

<sup>a</sup>SMF: social media features.

<sup>b</sup>The features are grouped based on our taxonomy with the highest percentage for each category of social media features in italics.

<sup>c</sup>►: symbol used to denote a subcategory.

<sup>d</sup>SMS: short message service.

<sup>e</sup>OSN: online social network.
