# Supplementary material for: Peer-Based Social Media Features in Behavior Change Interventions: Systematic Review
Source: PubMed Central journal article supplement (PMC5843796; doi:10.2196/jmir.8342), 2018-02-22
Supplement: jmir_v20i2e20_app5.pdf [file jmir_v20i2e20_app5.pdf]

## Social media features leading to behavioral change

| Studies    |       | OSN | Communication (Many to Many >> Asynchronous) | Communication (Many to Many >>> Synchronous) | Communication (One to One) | Peer Grouping | Activity Data Viewing | Identity Representation |                                                                                                                                                   |
|------------|-------|-----|----------------------------------------------|----------------------------------------------|----------------------------|---------------|-----------------------|-------------------------|---------------------------------------------------------------------------------------------------------------------------------------------------|
|            |       |     |                                              |                                              |                            |               |                       |                         |                                                                                                                                                   |
| [26]       | W+D+P | X   |                                              |                                              |                            |               |                       |                         | OSN capabilities site had no significant effect for weight loss.                                                                                  |
| [62-64]    |       |     |                                              | X                                            |                            |               |                       |                         | Chatroom-based online meetings had no effect on the outcome (weight loss).                                                                        |
| [75]       |       |     | X                                            |                                              |                            |               |                       |                         | No link between use of online forums and weight loss among male but a small effect was found among female participants.                           |
| [79]       |       |     | X                                            |                                              |                            |               |                       |                         | Guided discussion group in online forums led to significant reduction in weight/shape concerns compared to control.                               |
| [108]      |       |     | X                                            |                                              |                            |               |                       |                         | Peer-led support in online forums found to contribute to weight loss.                                                                             |
| [8]        |       |     |                                              |                                              |                            |               | X                     |                         | Participants in teams (online groups) reported higher social influence for weight loss, led to higher percentage of weight loss.                  |
| [5]        |       |     |                                              |                                              |                            |               | X                     |                         | Number of social connections/virtual friends: linked to weight loss and their friends weight loss (positive correlation).                         |
| [76]       |       |     | X                                            | X                                            |                            |               | X                     |                         | Evidence that social support components (friends, virtual world, chatrooms) related to weight loss.                                               |
| [57]       |       |     | X                                            |                                              |                            | X             |                       |                         | Participants using OSN features more, especially sending private messaging tended to increase time walking and lost more weight.                  |
| [143-145]  |       |     | X                                            |                                              |                            |               |                       |                         | Engagement with twitter related to weight loss.                                                                                                   |
| [135, 136] |       |     |                                              | X                                            | X                          |               |                       |                         | Participants who attended more chat sessions achieved greater weight loss., number of posts to online forum was also associated with weight loss. |
| [118]      |       | W+D | X                                            |                                              |                            |               | X                     |                         | Higher social interaction on OSN associated with higher weight loss.                                                                              |
| [129]      |       |     | X                                            |                                              |                            |               | X                     |                         | The use of Facebook groups was significantly related to weight loss at 3 and 6 months.                                                            |
| [85]       |       | D+P | X                                            |                                              |                            |               |                       |                         | X                                                                                                                                                 |
| [133]      |       |     |                                              |                                              |                            |               |                       | X                       | Significant increase in number of steps taken by participants during the social interaction and social game conditions compared to the control.   |
| [81]       | P     |     |                                              |                                              |                            | X             |                       |                         | Increase in step counts for version with social component (viewing team progress).                                                                |
| [82]       |       |     |                                              |                                              |                            | X             |                       |                         | Larger decreases among participants in social groups in terms of sedentary behaviour.                                                             |
| [46]       |       |     | X                                            |                                              |                            |               | X                     |                         | Higher physical activity in social condition compared to control.                                                                                 |
| [50]       |       |     |                                              |                                              |                            |               | X                     |                         | Buddy assignment to share game status led to higher engagement which resulted in higher and sustained physical activity levels.                   |

|          |   |   |   |   |   |   |                                                                                                                                                                      |
|----------|---|---|---|---|---|---|----------------------------------------------------------------------------------------------------------------------------------------------------------------------|
| [73]     |   |   |   |   | X |   | Having social connection/friend helped exercise longer; Encouragement from strong partner had negative impact on performance.                                        |
| [38]     |   |   |   |   | X |   | Presence of friends related to recording above average step log days by participants.                                                                                |
| [92]     | D | X |   |   |   |   | Greater improvement in food safety among those spending time on Facebook page.                                                                                       |
| [14]     |   |   |   | X |   |   | The use of private messaging led to an increase in abstinence rates.                                                                                                 |
| [31]     |   | X | X |   | X |   | Participants who posted on forum or have social connections, send/receive private messages were more likely to quit smoking.                                         |
| [32]     |   | X |   |   |   |   | Reading online forum messages influenced intent to adopt behaviour.                                                                                                  |
| [140]    |   | X |   |   |   | X | Participants with access to virtual world and OSN (QuitNet) components had significant changes in quitting, amount they smoked and increased intentions to quit.     |
| [141]    | S | X | X |   |   | X | Participants with access to virtual world and 3D chatroom components were more likely to report abstaining from smoking, smoking fewer cigarettes, quitting smoking. |
| [55, 56] |   | X |   | X | X |   | Groups with social media features more effective overall.                                                                                                            |
| [117]    |   | X |   |   |   |   | Using online forums had no effect on outcome (smoking cessation).                                                                                                    |
